# Supplementary material
Source: PubMed Central journal article supplement (PMC6812994)
Supplement: JCM.01206-19-s0001.pdf [file JCM.01206-19-s0001.pdf]

1 **Supplementary text**

2 **Protocol for whole-genome sequencing**

3 Whole genome sequencing was performed with Illumina MiSeq (Illumina, Inc., San Diego,  
4 CA). Library preparation for Illumina MiSeq sequencing was performed with QIAseq FX  
5 DNA Library Kit (Qiagen, Tokyo, Japan). Libraries were sequenced on a MiSeq system for  
6 600 cycles (300-bp paired-end reads). Raw reads generated by Miseq were quality trimmed  
7 with Trimmomatic tool (version 0.38) and assembled using SPAdes (version 3.12.0).

8

9 **Identification of bacterial species**

10 Bacterial species were identified using KmerFinder 2.5 by adopting the species of the  
11 sequences showing highest scores (1). Inaccurate registrations of the bacterial species of  
12 reference sequences were corrected during the process (Accession No. CP024784: *K.*  
13 *quasipneumoniae* registered as *Enterobacteriaceae*; CP024784: *K. quasipneumoniae*  
14 registered as *K. pneumoniae*) (2).

15

16 **Capsular genotyping**

17 Capsular genotyping was performed using Kaptive web and only results showing match  
18 confidence of Perfect, Very high, High, or Good were adopted (3).

19

20 **Protocol for Single-Nucleotide Polymorphism (SNP) Identification**

21 Isolates belonging to K1-ST23 or K62-ST36 were selected for SNP identification. *Klebsiella*  
22 *pneumoniae* NTUH-2044 isolate belonging to K1-ST23 (GenBank accession number  
23 AP006725.1) was selected for the reference isolate (4). The MiSeq sequencing reads were  
24 aligned to the genomic sequence of the reference isolate using the Burrows-Wheeler Aligner  
25 (BWA) with 'MEM' option (5). We constructed a provisional core genome alignment for each

26 group (K1-ST23 and K62-ST36) using SAMtools (version 1.1) mpileup (6) and VarScan  
27 (version 2.3.7) mpileup2cns (7) and then a maximum-likelihood tree using PhyML (8). Using  
28 this as the starting tree, we inferred homologous recombination sites, which should be  
29 excluded from the core-genomes, with ClonalFrameML (9). SNPs of the confirmed core  
30 genomes (4,983,362 bp (93.6% of the genomic sequence of NTUH-2044) for K1-ST23  
31 isolates and 4,821,982 bp (90.6% of the genomic sequence of NTUH-2044) for K62-ST36  
32 isolates) were identified with snp-dists (<https://github.com/tseemann/snp-dists>).

33

## 34 **References**

- 35 1. Larsen MV, Cosentino S, Lukjancenko O, Saputra D, Rasmussen S, Hasman H,  
36 Sicheritz-Pontén T, Aarestrup FM, Ussery DW, Lund O. 2014. Benchmarking of methods  
37 for genomic taxonomy. *J Clin Microbiol* 52: 1529-1539.
- 38 2. Kitajima M, Ishizaki S, Jang J, Ishii S, Okabe S. 2018. Complete Genome Sequence of  
39 *Klebsiella quasipneumoniae* Strain S05, a Fouling-Causing Bacterium Isolated from a  
40 Membrane Bioreactor. *Genome Announc* 6: e00471-18.
- 41 3. Wick RR, Heinz E, Holt KE, Wyres KL. 2018. Kaptive Web: User-Friendly Capsule and  
42 Lipopolysaccharide Serotype Prediction for *Klebsiella* Genomes. *J Clin Microbiol* 56:  
43 e00197-18.
- 44 4. Wu KM, Li LH, Yan JJ, Tsao N, Liao TL, Tsai HC, Fung CP, Chen HJ, Liu YM, Wang JT,  
45 Fang CT, Chang SC, Shu HY, Liu TT, Chen YT, Shiau YR, Lauderdale TL, Su IJ, Kirby  
46 R, Tsai SF. 2009. Genome sequencing and comparative analysis of *Klebsiella*  
47 *pneumoniae* NTUH-K2044, a strain causing liver abscess and meningitis. *J Bacteriol*  
48 191:4492-4501.
- 49 5. Li H, Durbin R. 2009 Fast and accurate short read alignment with Burrows-Wheeler  
50 transform. *Bioinformatics* 25:1754-1760.

- 51 6. Li H1, Handsaker B, Wysoker A, Fennell T, Ruan J, Homer N, Marth G, Abecasis G,  
52 Durbin R. 2009. The Sequence Alignment/Map format and SAMtools. *Bioinformatics*  
53 25: 2078-2079.
- 54 7. Koboldt DC, Zhang Q, Larson DE, Shen D, McLellan MD, Lin L, Miller CA, Mardis ER,  
55 Ding L, Wilson RK. 2012. VarScan 2: somatic mutation and copy number alteration  
56 discovery in cancer by exome sequencing. *Genome Res* 22: 568-576.
- 57 8. Guindon S, Dufayard JF, Lefort V, Anisimova M, Hordijk W, Gascuel O. 2010. New  
58 algorithms and methods to estimate maximum-likelihood phylogenies: assessing the  
59 performance of PhyML 3.0. *Syst Biol* 59:307-321.
- 60 9. Didelot X, Wilson DJ. 2015. ClonalFrameML: efficient inference of recombination in  
61 whole bacterial genomes. *PLoS Comput Biol* 11:e1004041.
